# Supplementary material for: Sb 2 S 3 @carboxyl-modified COF S-scheme heterojunctions: the Sb–O–C interface enhances photocatalytic CO 2 reduction performance
Source: Royal Society of Chemistry journal article supplement (doi:10.1039/d5gc04211a), 2025-12-19
Supplement: d5gc04211a1.pdf [file d5gc04211a1.pdf]

## Electronic supplementary information (ESI)

# **Sb<sub>2</sub>S<sub>3</sub>@Carboxyl-modified COF S-Scheme heterojunction: Sb-O-C interface enhances photocatalytic CO<sub>2</sub> reduction performance**

*Zhenfeng Zhong<sup>a</sup>, Chenyu Zhou<sup>a</sup>, Ming Zhu<sup>a</sup>, Huaizhi Yang<sup>b</sup>, Yuqi Wan<sup>a,c</sup>, Zhiquan*

*Pan<sup>a</sup>, Qingrong Cheng<sup>a,\*</sup>*

- <sup>a</sup> School of Chemistry and Environmental Engineering, Key Laboratory of Green Chemical Engineering Process of Ministry of Education, Engineering Research Center of Phosphorus Resources Development and Utilization of Ministry of Education, Wuhan Institute of Technology, Wuhan 430205, PR China
- <sup>b</sup> School of Chemistry and Chemical Engineering, Nanjing University, Nanjing, 210033, P. R. China
- <sup>c</sup> The Faculty of Dentistry, The University of Hong Kong, Hong Kong, 999077, PR China.

### **Corresponding author:**

\*(Q.C.) E-mail: [chengqr383121@sina.com](mailto:chengqr383121@sina.com)

Total number of pages: **31**

Total number of Tables: **12**

Total number of Figures: **18**

Total number of Formulas: **9**

## 1. Materials

Antimony trichloride ( $\text{SbCl}_3$ ), 1,4-dioxane, p-toluenesulfonic acid (TsOH), pyruvic acid, Benzene-1,3,5-tricarbaldehyde, p-phenylenediamine were provided by McLean Reagent. Anhydrous ethanol, ethylene glycol, methanol, ethyl acetate, n-hexane, acetic acid, Mesitylene, tetrahydrofuran were provided by Sinopharm. The experimental chemicals were of analytical grade and most of the synthetic reactions used ethylene glycol.

## 2. Synthesis of COF-LZU-1

Weighed Benzene-1,3,5-tricarbaldehyde (32 mg, 0.05 mmol) and p-phenylenediamine (32.22 mg, 0.075 mmol) powder placed in a 10 mL vial, respectively, add anhydrous ethanol (4 mL), Mesitylene (3 mL), sonicate for 4 min, 4 min, and finally add 3 mol/L acetic acid solution (1 mL) to sonicate for 2 min. After mixing well and plugging tightly with a solid rubber stopper, the bottles were frozen in an ice-salt bath for 12 h. After freezing for 12 h, the bottles were filled with nitrogen-vacuumed three times and wrapped tightly with tinfoil. The reaction was carried out in a hydrothermal kettle at a solvent heat of 120 °C for 48 h and then cooled down to room temperature naturally. The obtained solid was washed with hot tetrahydrofuran and methanol for four times, then dried and stored at 60 °C, and ground to obtain a yellow-green powder, COF-LZU-1.

### 3. Synthesis of COF-LC

COF-LZU-1 (100 mg), 1,4-dioxane (1 mL), Mesitylene (1 mL), 6 M aqueous acetic acid (400  $\mu$ L), TsOH (40 mg of p-toluenesulfonic acid), and pyruvic acid (56  $\mu$ L, 0.6 mmol) were added to the silylene vial. After ultrasonication for 20 min and freezing in an ice-salt bath for 12 h, the freezing process was followed by nitrogen filling-vacuuming three times and sealing. The reaction was heated at 120°C for 3 days to produce a precipitate and the product was isolated by suction and washed with methanol, ethyl acetate and hexane and dried under vacuum at 60°C for 24 h. Grinding yielded an orange-red powder for the COF-LC sample.

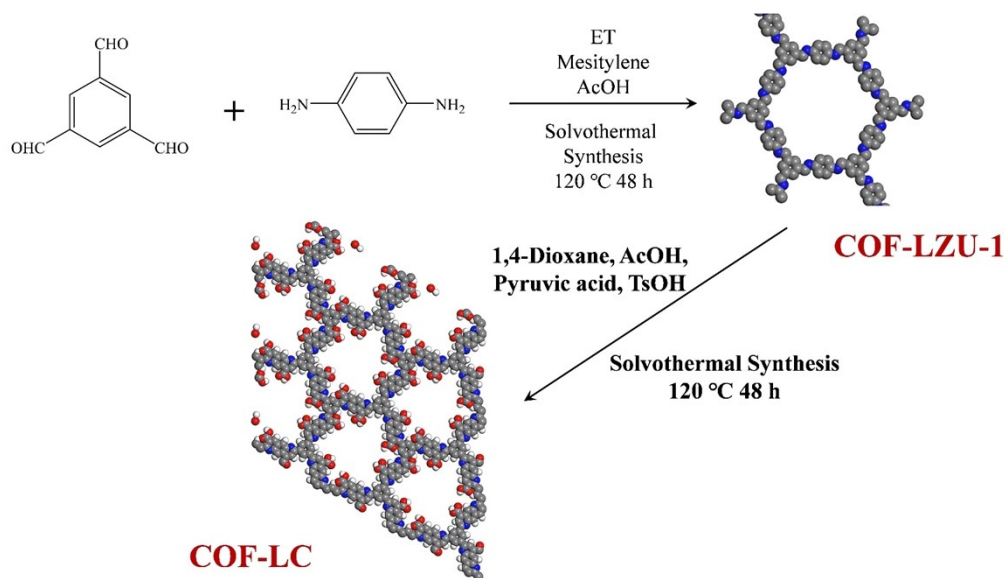

**Scheme. S1** Schematic diagram of the COF-LC synthesis route.

#### 4. Synthesis of $\text{Sb}_2\text{S}_3$

0.724 g of  $\text{SbCl}_3$  were added to 80 mL of ethylene glycol and then magnetically stirred for 1 h. Then 1.4 g of thiourea was added to the above solution and stirred continuously to obtain a clarified solution. Subsequently, the obtained solution was kept in a reactor at 180 °C for 10 h. After reaching room temperature, the product was collected by centrifugation, rinsed several times with anhydrous ethanol and deionized water, and dried at 60 °C for 12 h. The black powder was obtained as  $\text{Sb}_2\text{S}_3$ .

#### 5. Instrumentation

The surface and internal morphology were imaged by means of scanning electron microscopy (SEM, Gemini SEM 300, Carl Zeiss, Germany) and high-resolution transmission electron microscopy (TEM, Titan G260-300, FEI, USA), respectively. TEM was utilised in conjunction with Energy Dispersive X-ray Spectrometry (EDS) to obtain elemental mapping images. Powder X-ray diffraction (P-XRD) patterns were measured employing a Rigaku MiniFlex600 from Japan over a test range of 2-90° at a scan rate of 1° min<sup>-1</sup>. FTIR spectroscopic analysis was performed in the 4000 - 400 cm<sup>-1</sup> range using a Scientific Nicolet iS 20 spectrometer (Thermo Fisher, USA) with KBr as a background. UV-Vis diffuse reflectance (UV-Vis DRS) absorption spectra were recorded using a Shimadzu UV spectrometer (UV-3600i Plus) with an integrating sphere attachment. Using  $\text{BaSO}_4$  as the reflectance standard, the analysis range is from

200 nm to 800 nm. A K-Alpha spectrometer (Thermo Scientific, USA) equipped with an Al K $\alpha$  X-ray source ( $h\nu = 1486.6$  eV) was used to obtain X-ray photoelectron spectra (XPS). The N<sub>2</sub> adsorption-desorption isotherm was measured at 393.15 K using an ASAP 2460 instrument from Micromeritics (USA) and was interpreted using the Brunner-Emmett-Taylor (BET) equation. The Barret-Joyner-Halenda (BJH) model was used to generate the pore size distribution maps. The activated species were measured by analysis of electron spin resonance (ESR) spectra using a Bruker EMXPLUS-6/1 spectrometer from Germany. Zeta potentials were obtained using a Malvern Zetasizer Nano ZS90, UK. Fluorescence spectra (FL) were tested using the Edinburgh FLS1000 in the UK, and the emission peak under 468 excitation was used as the monitoring wavelength when testing the lifetime.

## **6. Photoelectrochemical measurements**

Electrochemical impedance spectroscopy (EIS), transient photocurrent (TPC), and Mott-Schottky (M-S) curve tests were conducted on a normal three-electrode system with an electrochemical analyzer (CS Studio 6, Corr Test, China). As counter and reference electrodes, Pt and Ag/AgCl electrodes were chosen. A solution containing 5 mmol·L<sup>-1</sup> K<sub>3</sub>[Fe(CN)<sub>6</sub>] and 0.1 mol·L<sup>-1</sup> KCl was used as the electrolyte for the EIS test. The M-S and TPC tests utilised an aqueous solution of 0.5 mol·L<sup>-1</sup> Na<sub>2</sub>SO<sub>4</sub> as the electrolyte and a 300W xenon lamp as the light source. The pH of the solution was 6.85.

## **7. Photocatalytic degradation experiment**

A 300 W Xenon lamp was employed as an emulated solar light source. The degradation process of Methylene Blue (MB) is employed as an illustrative example:

During the photocatalytic degradation experiment, 10mg of sample powders and 50mL MB (30mg·L<sup>-1</sup>) aqueous solution were introduced into the quartz reactor while being stirred magnetically. The mixture was continuously magnetically stirred for 1 h to achieve adsorption-desorption equilibrium in the absence of light prior to the photoreaction. Upon sunlight exposure, 3 mL of sample was taken from the suspension every 10 minutes up to 60 minutes. The absorption spectrum of MB was measured using the UV spectrophotometer (UV-2450, Shimadzu, Japan) from the supernatant liquid of each sample. The photocatalysts were filtered out through a 0.22 µm Millipore filter (aqueous phase) before each measurement. Then the degradation rate of CIP could be calculated by the following formula (Eq. S1):

$$\text{Degradation rate (DR, \%)} = (C_0 - C_t) / C_0 \times 100\% \quad (1)$$

where  $C_0$  represents the absorbance value of the initial concentration of CIP achieved at adsorption-desorption equilibrium, and  $C_t$  represents the concentration at a specific irradiation time. The maximum absorbance of MB was determined at a wavelength of 664 nm. Consequently, the photocatalytic degradation activity of other pollutants could be measured by these similar steps.

## 8. Photocatalytic cyclic degradation experiment

The photocatalytic cyclic degradation experiment was conducted using the semi-permeable membrane method, utilizing 30 mg of photocatalyst. The sample was kept after adsorption-desorption equilibrium, and the ultimate sample was acquired following 60 min of irradiation. This whole process constitutes one cycle. Rinse the remaining MB on the membrane surface lightly with DI water and dry as much as possible overnight at 60 °C. Then, the following day, 50 mL of fresh 30 mg·L<sup>-1</sup> MB solution was added and a new round of the photocatalytic degradation test was started. These experimental parts were repeated five cycles for a total of 8 hours.

## **9. Photocatalytic free radicals capture experiment**

The procedure for the photocatalytic trapping experiments was basically the same as for the photocatalytic degradation experiment. The only difference is that various scavengers for distinct active species were introduced into the reactor 10 seconds before the lamp irradiation and kept the sample intact in time.

## **10. Photocatalytic CO<sub>2</sub> reduction experiment**

The photocatalytic CO<sub>2</sub> reduction reaction was carried out in a 110 mL cylindrical sealed quartz reactor. The light source was a 300 W xenon lamp (light intensity 1000 mW/cm<sup>2</sup>). 30 mg of photocatalyst, and 50 mL of mixed solution (using the volume ratio of the three solutions mixed, H<sub>2</sub>O: MeCN: TEOA=1:3:1) were mixed and dispersed by ultrasonication for 10 min. The reactor system was purged with CO<sub>2</sub> for at least 20 minutes to ensure that the air in the reactor was completely replaced by CO<sub>2</sub> and that the internal partial pressure was 0.04 MPa. In this, the sample was homogeneously

suspended in the reactor and magnetically stirred. During the photocatalytic experiments, 300  $\mu\text{L}$  of gas was extracted from the reactor every hour with a syringe needle and quantified by a gas chromatograph (GC9790II, China). The CO produced is determined by gas chromatography and the CO output rate can be calculated using the following formula (Eq. S2):

$$\text{CO production rate} = \text{amount of CO } (\mu\text{mol}) / [5 \text{ (h)} * m_{\text{sample}} \text{ (g)}] (\mu\text{mol} \cdot \text{h}^{-1} \cdot \text{g}^{-1}) \quad (2)$$

## 11. Photocatalytic cyclic CO<sub>2</sub> reduction experiment

The photocatalytic cyclic CO<sub>2</sub> reduction test was repeated the experimental steps described above for five cycles.

## 12. Isotope tracer experiment

Isotope tracer experiments were conducted using either <sup>13</sup>CO<sub>2</sub> (99% purity) or <sup>12</sup>CO<sub>2</sub> as reactant under standard reaction conditions. After a 4-hour reaction, 300  $\mu\text{L}$  gas in the head space was injected into a Shimadzu GCMS QP2010.



### 13. Theoretical calculation method

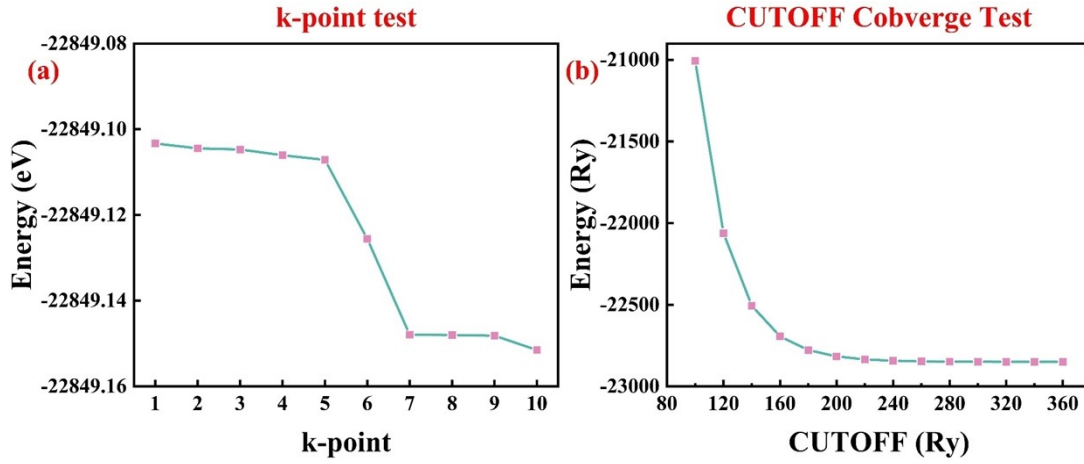

**Fig. S1** (a) k-point test; (b) Convergence test for cut-off energy

Theoretical computations utilizing the CASTEP module within the Materials Studio software apply the GGA-PBE (Generalized Gradient Approximation-Perdew Burke Ernzerhof) function. In this paper, the geometrical optimisation conditions for  $\text{Sb}_2\text{S}_3$  and COF-LC are as follows, with the k-points set to  $3 \times 3 \times 3$  (**Fig.S1a**) and  $1 \times 1 \times 1$ , respectively. The cut-off energy was set to 320 eV (**Fig.S1b**). The convergence tolerance parameter for the maximum step size is 0.001 Å, the maximum force is 0.01 eV/Å, the energy change is  $1.0 \times 10^{-6}$  eV/atom, and the maximum stress is 0.05 GPa. In the surface structure calculations, a 15 Å vacuum layer was constructed to eliminate interactions between the periodic structures of the surface model, and all of the above calculations have been tested for convergence.

### 14. TR-PL

The TR-PL decay spectra curves were fitted by the biexponential decay kinetics function expressed as **Eq. (3)**:

$$I(t) = B_1 e^{-t/\tau_1} + B_2 e^{-t/\tau_2} \quad (3)$$

Meanwhile, the average lifetime  $\tau_{av}$  was determined using the **Eq. (4)** :

$$\tau_{av} = (B_1 \tau_1^2 + B_2 \tau_2^2) / (B_1 \tau_1 + B_2 \tau_2) \quad (4)$$

The  $\tau_1$  and  $\tau_2$  were the short and long lifetimes, which was mainly contributed by the radiative pathways and reflected the nonradiative process, respectively. The  $K_{ent}$  was the rates of the non-radiative transfer, which can be calculated according to the **Eq.5**:

$$K_{ent} = \tau_1^{-1} - \tau_2^{-1} \quad (5)$$

The parameters and results of fluorescence lifetime calculation are shown in **Table S6**.

## 15. DFT calculation of photogenerated carrier mobility

The carrier mobility is derived from the deformation potential theory as **Eq.6**:

$$\mu = (2eh^3 C_{2D}) / (3K_B T |m^*| E_d^2) \quad (6)$$

where  $\hbar$ ,  $K_B$  and  $T$  are the approximate Planck's constant, Boltzmann's constant and temperature, respectively, and  $m^*$ ,  $E_d$  and  $C_{2D}$  are the effective mass, the deformation potential constant and the elasticity constant of the 2D material, respectively. Stresses were selected as 99%, 99.5%, 100%, 100.5%, 101%.

## 16. AQY calculation section

The apparent quantum yield (AQY) of the photocatalyst was calculated using the

**Eq.7:**

$$AQY(\%) = \text{the number of reacted electrons} / \text{the number of incident electrons} \times 100\% \quad (7)$$

Namely:

$$\begin{aligned} AQY(\%) &= N_e / N_p \times 100\% \\ &= \left[ 10^9 (\nu \times N_A \times K) \times (h \times c) \right] / \left[ (I \times A \times \lambda) \right] \times 100\% \quad (8) \end{aligned}$$

$\nu$ = CO generation rate

$N_A$ = Avogadro number =  $6.02 \times 10^{23}$

$K$ = Number of electrons transferred by the reaction

$K_{CO} = 2$

$K_{H_2} = 2$

$h = 6.626 \times 10^{-34}$  J/s

$c = 3 \times 10^8$  m/s

$I$  = Optical power density ( $W \cdot m^2$ )

$A$  = Incident light area ( $m^2$ )

$\lambda$  = wavelength (nm)

**Table S1** The amount of various raw materials in the composite synthesis (SSLC-x (x=1-3)).

| heterojunction-x | $\text{Sb}_2\text{S}_3$ (g) | COF-LC (g) |
|------------------|-----------------------------|------------|
| SSLC-1 (1:1)     | 0.050                       | 0.050      |
| SSLC-2 (2:3)     | 0.050                       | 0.075      |
| SSLC-3 (3:7)     | 0.050                       | 0.117      |

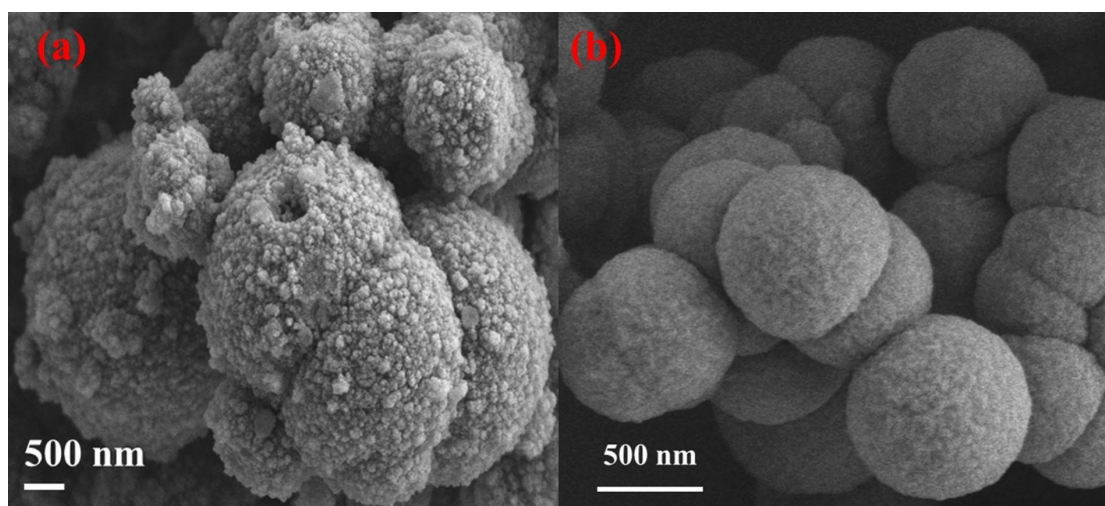

**Fig. S2** Before and after modification COF-LC(a) and LZU-1(b).

**Table S2** The energy dispersive spectrum (EDS) of the SSLC-2 photocatalyst.

| ELEMENT  | [NORM. WT. %] | [NORM. AT. %] |
|----------|---------------|---------------|
| CARBON   | 23.82         | 58.10         |
| NITROGEN | 3.66          | 7.66          |
| OXYGEN   | 2.11          | 3.86          |
| ANTIMONY | 50.44         | 12.13         |
| SULFUR   | 19.97         | 18.25         |
| SUM:     | 100           | 100           |

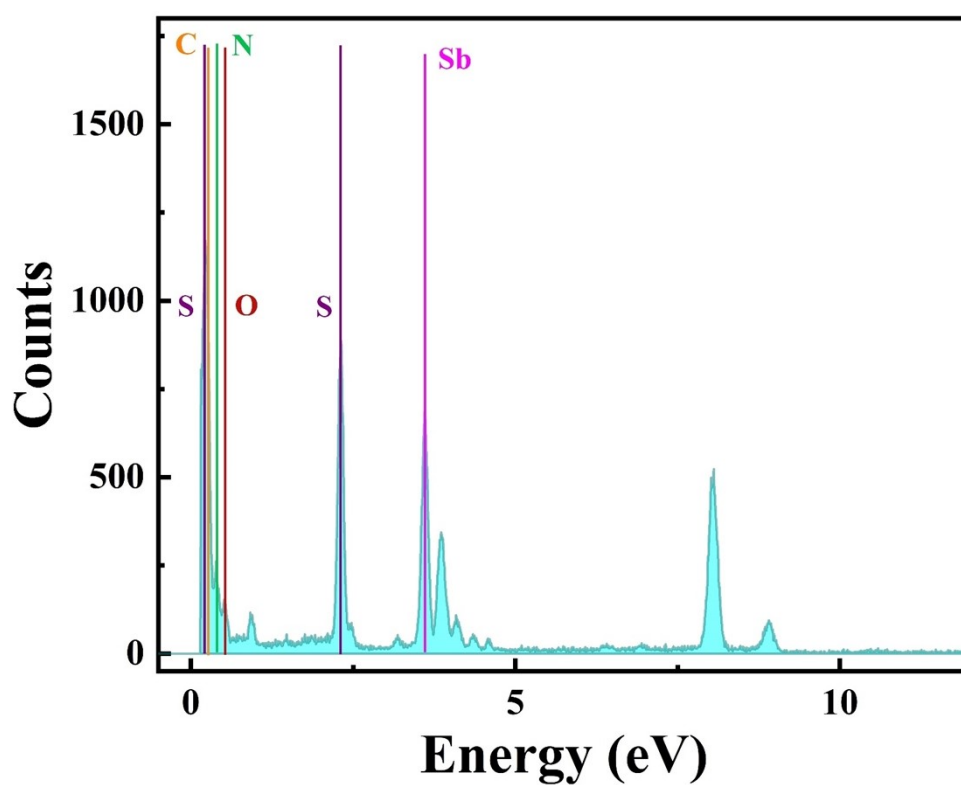

**Fig. S3** The EDS element content data of photocatalyst SSLC-2.

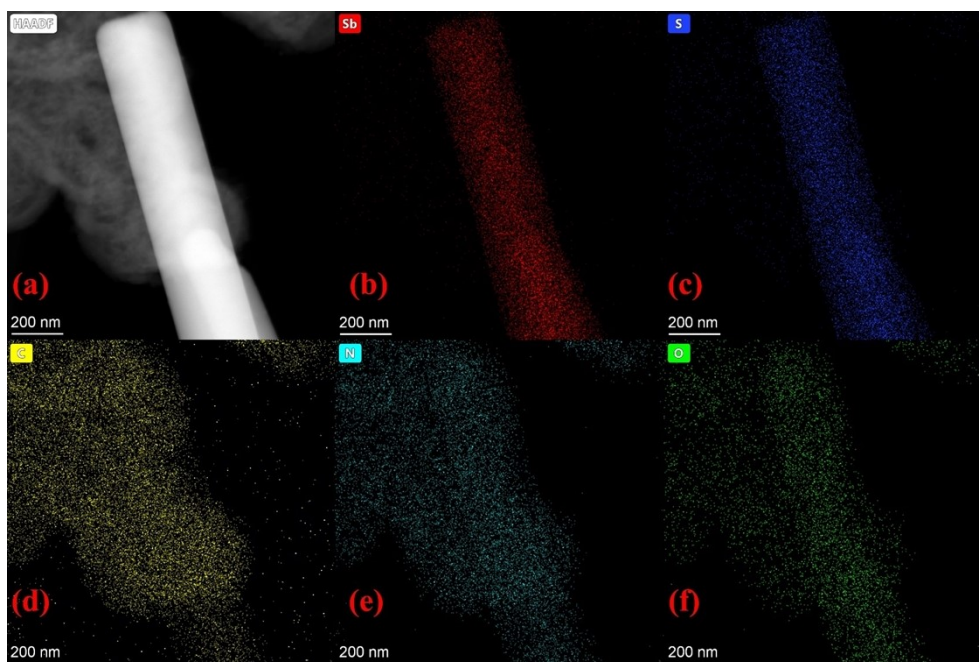

**Fig. S4** The EDX spectroscopy mapping images of (a) HAADF of SSLC-2, (b) Sb, (c) S, (d) C, (e) N, (f) O elements.

**Table 3** Zeta potential values of three monomers at different pH solutions

| Sample                             | pH value | Potential average (mV) |
|------------------------------------|----------|------------------------|
| <b>Sb<sub>2</sub>S<sub>3</sub></b> | 3        | 39.73                  |
|                                    | 7        | 21.53                  |
|                                    | 10       | -10.51                 |
| <b>COF-LC</b>                      | 3        | -30.73                 |
|                                    | 7        | -18.43                 |
|                                    | 10       | 33.00                  |

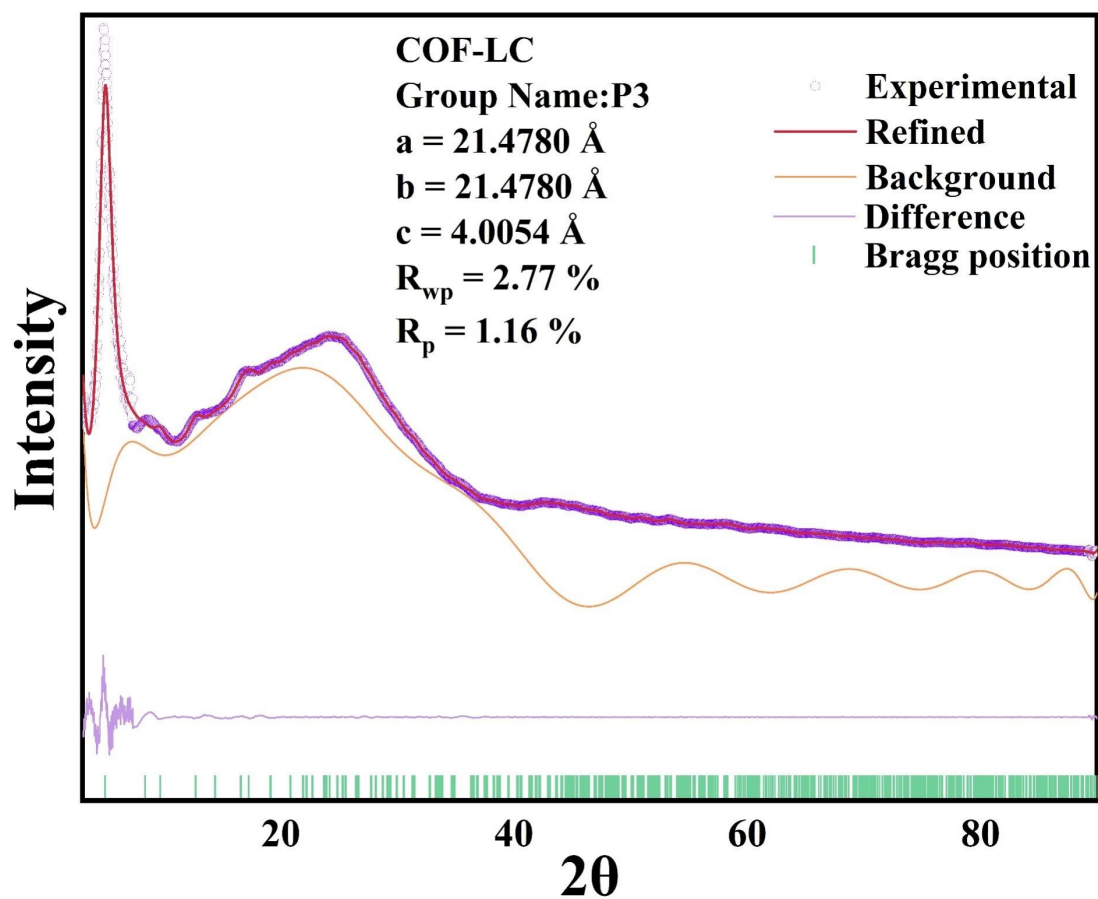

**Fig. S5** Experimental and simulated PXRD patterns of COF-LC.

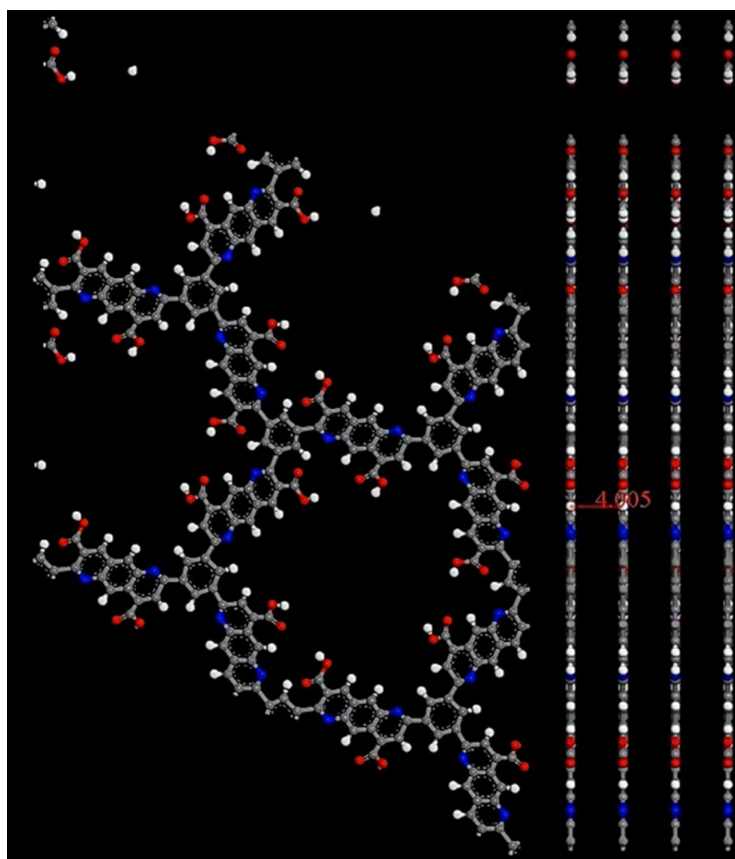

**Fig. S6** Structure of COF-LC

**Table S4** BET quantitative results of specific surface area and porosity distribution of 4 catalysts

|                                                | $\text{Sb}_2\text{S}_3$ | COF-LZU-1 | COF-LC | SSLC-2 |
|------------------------------------------------|-------------------------|-----------|--------|--------|
| <b>The specific surface areas</b>              |                         |           |        |        |
| ( $\text{m}^2/\text{g}$ )                      | 1.25                    | 32.42     | 79.73  | 96.02  |
| <b>Adsorption average pore diameter (4V/A)</b> |                         |           |        |        |
| (nm)                                           | 12.80                   | 16.30     | 6.51   | 7.28   |



**Table S5** The elements values and error (%) of selected equivalent circuits for EIS.

| SAMPLE/VALUE                       | $R_s$ ( $\Omega$ ) | $R_{ct}$ ( $\Omega$ ) | CPE1-T   | CPE1-P |
|------------------------------------|--------------------|-----------------------|----------|--------|
| <b>Sb<sub>2</sub>S<sub>3</sub></b> | 8.708              | 2610.20               | 8.129E-5 | 0.784  |
| ERROR (%)                          | 1.438              | 3.471                 | 0.791    | 0.494  |
| <b>LZU-1</b>                       | 9.998              | 3208.70               | 7.646E-5 | 0.736  |
| ERROR (%)                          | 2.134              | 3.424                 | 0.978    | 0.625  |
| <b>COF-LC</b>                      | 8.203              | 1714.90               | 8.056E-5 | 0.869  |
| ERROR (%)                          | 1.400              | 3.849                 | 1.139    | 0.705  |
| <b>SSLC-1</b>                      | 17.186             | 547.55                | 8.046E-5 | 0.812  |
| ERROR (%)                          | 0.547              | 2.171                 | 0.626    | 0.564  |
| <b>SSLC-2</b>                      | 17.692             | 223.08                | 4.043E-5 | 0.809  |
| ERROR (%)                          | 0.827              | 1.299                 | 0.979    | 0.827  |
| <b>SSLC-3</b>                      | 15.474             | 928.86                | 9.218E-5 | 0.707  |
| ERROR (%)                          | 1.486              | 5.786                 | 1.384    | 1.323  |

**Table S6** Time-resolved fluorescence decay parameters of COF-LC, Sb<sub>2</sub>S<sub>3</sub> and SSLC-2 samples.

| SAMPLE                             | Lifetime<br>$\tau$ (ns)            | Pre-exponential<br>factors B%                  | Average<br>lifetime<br>$\tau_{av}$ (ns) | $\chi^2$ | $K_{ent}$ (ns <sup>-1</sup> ) |
|------------------------------------|------------------------------------|------------------------------------------------|-----------------------------------------|----------|-------------------------------|
| <b>COF-LC</b>                      | $\tau_1=0.7704$<br>$\tau_2=3.2827$ | B <sub>1</sub> =65.55<br>B <sub>2</sub> =34.45 | 1.6359                                  | 0.8059   | 0.9934                        |
| <b>Sb<sub>2</sub>S<sub>3</sub></b> | $\tau_1=0.2058$<br>$\tau_2=8.8134$ | B <sub>1</sub> =85.65<br>B <sub>2</sub> =14.35 | 1.4411                                  | 0.9253   | 4.7456                        |
| <b>SSLC-2</b>                      | $\tau_1=0.2409$<br>$\tau_2=5.2634$ | B <sub>1</sub> =94.29<br>B <sub>2</sub> =5.71  | 0.5278                                  | 0.9436   | 3.9611                        |

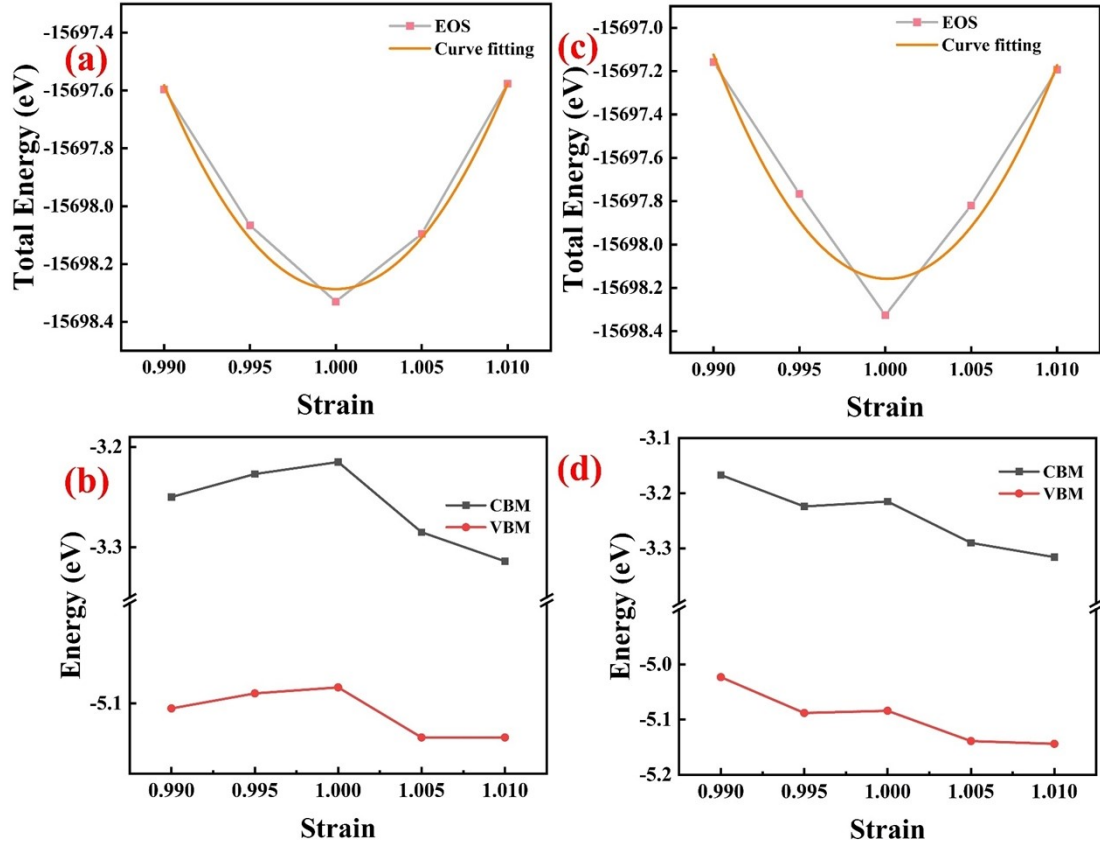

**Fig. S7** Calculation parameters related to COF-LC.

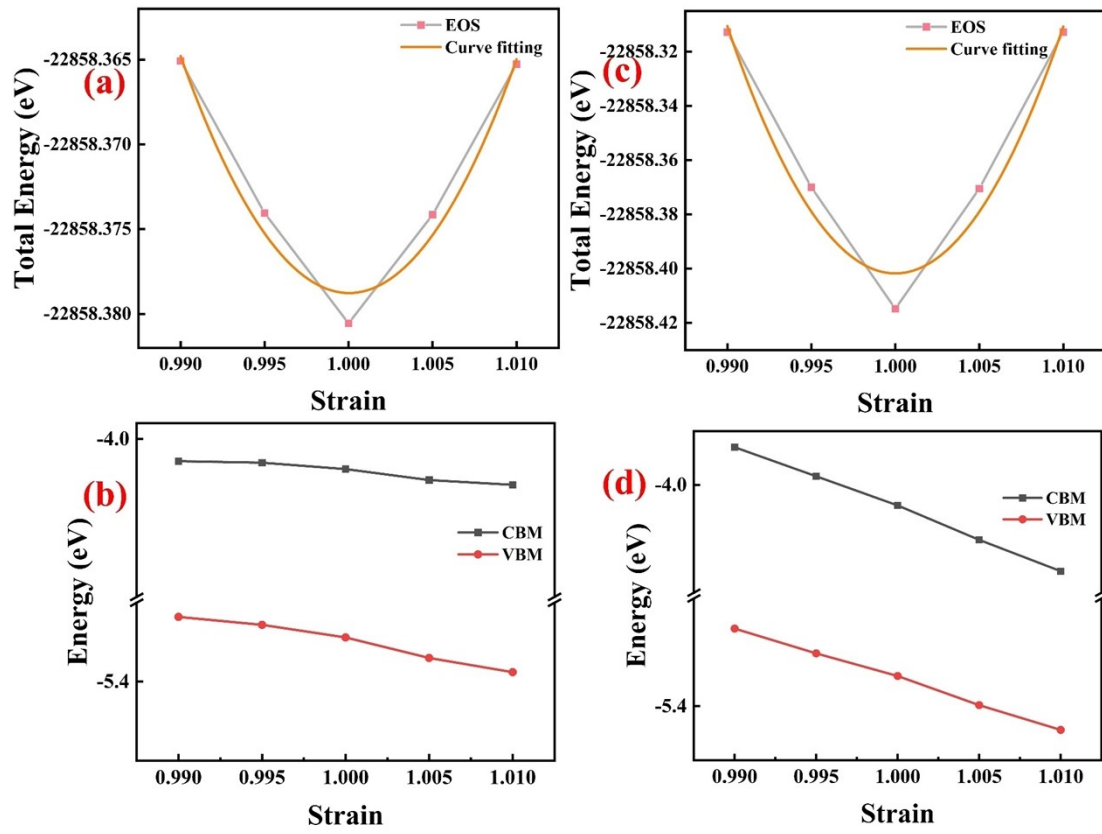

**Fig. S8** Calculation parameters related to Sb<sub>2</sub>S<sub>3</sub>.

**Table S7** Effective masses ( $m_e^*$ ), deformation potential constants ( $E_d$ , eV), elastic constants ( $C_{2D}$ , N·m<sup>-1</sup>) and carrier mobilities ( $\mu_{2D}$ , cm<sup>2</sup>·V<sup>-1</sup>·s<sup>-1</sup>) along the a-direction for both h<sup>+</sup> and e<sup>-</sup> in a monolayer of X(X=Sb<sub>2</sub>S<sub>3</sub>, COF-LC).

| System                         | Directional | Carriers | $m_e^*$ ( $m_0$ ) | $E_d$ (eV) | $C_{2D}$ (N·m <sup>-1</sup> ) | $\mu_{2D}$ (cm <sup>2</sup> ·V <sup>-1</sup> ·s <sup>-1</sup> ) |
|--------------------------------|-------------|----------|-------------------|------------|-------------------------------|-----------------------------------------------------------------|
| Sb <sub>2</sub> S <sub>3</sub> | x           | $h^+$    | 2.628             | -4.07      | 121.4665                      | 17.1648                                                         |
|                                |             | $e^-$    | 4.2475            | -4.42      |                               | 4.8929                                                          |
|                                | y           | $h^+$    | 2.4260            | -4.72      | 810.6349                      | 61.9115                                                         |
|                                |             | $e^-$    | 4.1841            | -5.78      |                               | 13.8803                                                         |
| COF-LC                         | x           | $h^+$    | 2.6494            | -2.04      | 7079.7741                     | 272.9267                                                        |
|                                |             | $e^-$    | 3.8843            | -3.72      |                               | 38.1865                                                         |
|                                | y           | $h^+$    | 2.6434            | -1.36      | 10098.5602                    | 879.9046                                                        |
|                                |             | $e^-$    | 3.8755            | -3.06      |                               | 80.8648                                                         |

**Table S8** Photocatalytic CO<sub>2</sub> reduction performance and selectivity of different samples.

| Sample                         | Selectivity (%) |                | Yield ( $\mu\text{mol}\cdot\text{g}^{-1}\cdot\text{h}^{-1}$ ) |                |
|--------------------------------|-----------------|----------------|---------------------------------------------------------------|----------------|
|                                | CO              | H <sub>2</sub> | CO                                                            | H <sub>2</sub> |
| Sb <sub>2</sub> S <sub>3</sub> | 98.17           | 1.82           | 13.95                                                         | 0.26           |
| LZU-1                          | 98.85           | 1.15           | 27.99                                                         | 0.33           |
| COF-LC                         | 99.54           | 0.46           | 176.69                                                        | 0.82           |
| SSLC-1                         | 99.83           | 0.17           | 627.16                                                        | 1.09           |
| SSLC-2                         | 99.71           | 0.29           | 831.74                                                        | 2.40           |
| SSLC-3                         | 99.70           | 0.30           | 528.54                                                        | 1.61           |

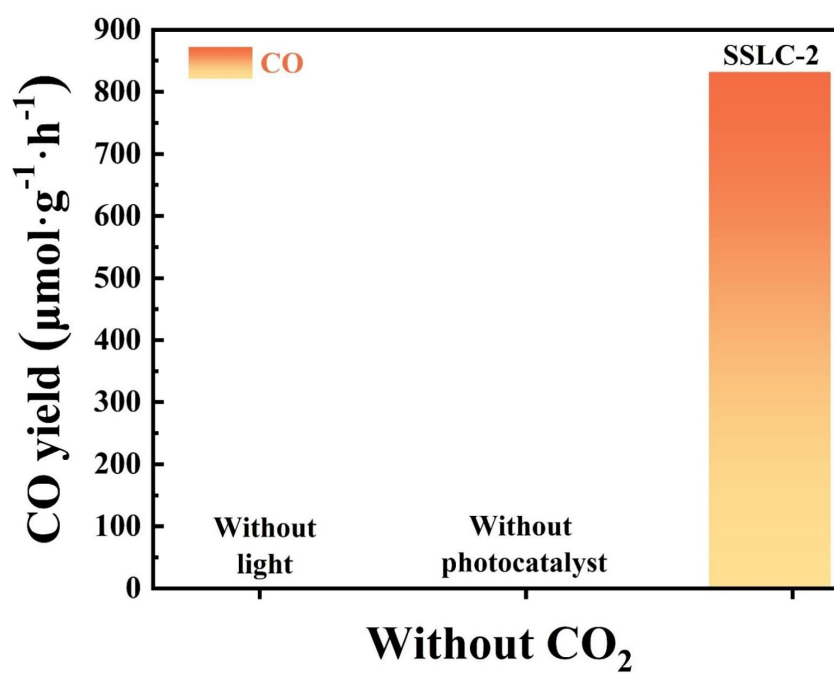

**Fig. S9** The control experiments that CO formation under different conditions on SSLC-2.

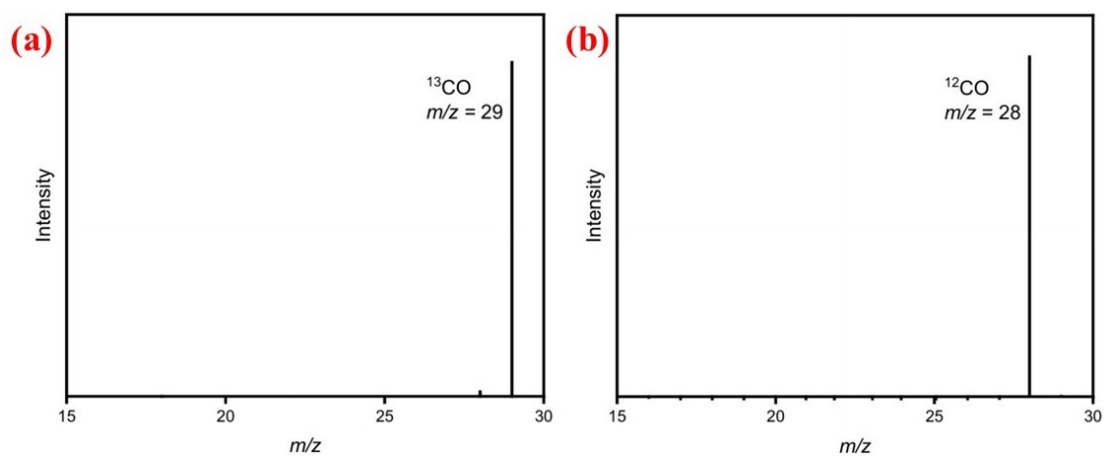

**Fig. S10** MS spectra of  $^{13}\text{CO}$  (top) and  $^{12}\text{CO}$  (bottom) after  $\text{CO}_2$  RR using  $^{13}\text{CO}_2$  and  $^{12}\text{CO}_2$ , respectively.

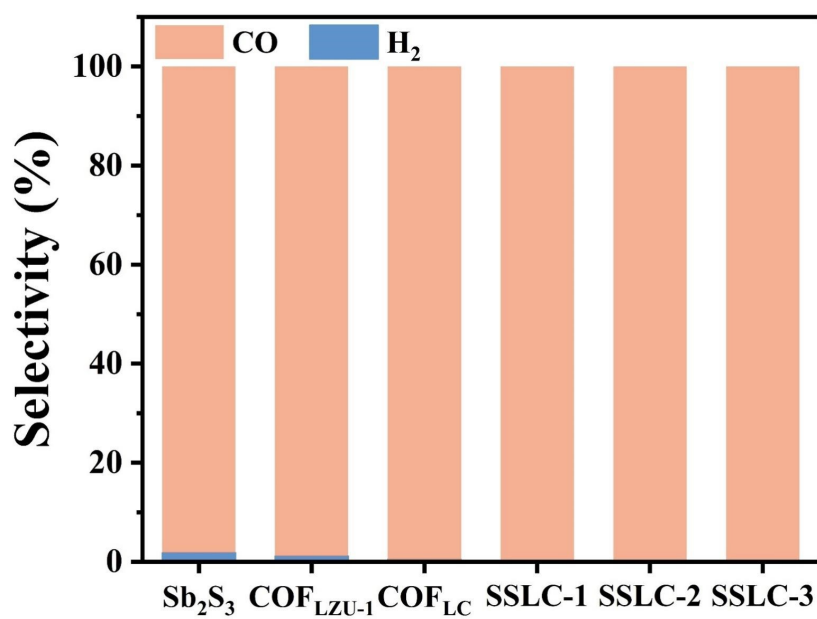

**Fig. S11** The selectivity of CO and  $\text{H}_2$ .

**Table S9** The AQY values for different samples irradiated at the same wavelength to produce CO and H<sub>2</sub>.

| Photocatalyst                      | H <sub>2</sub> production | CO production       | AQE (%)        |        |
|------------------------------------|---------------------------|---------------------|----------------|--------|
|                                    | ( $\mu\text{mol}$ )       | ( $\mu\text{mol}$ ) | H <sub>2</sub> | CO     |
| <b>Sb<sub>2</sub>S<sub>3</sub></b> | 0.26                      | 13.95               | 0.003          | 0.177  |
| <b>LZU-1</b>                       | 0.33                      | 27.99               | 0.004          | 0.356  |
| <b>COF-LC</b>                      | 0.82                      | 176.69              | 0.010          | 2.247  |
| <b>SSLC-1</b>                      | 1.09                      | 627.16              | 0.014          | 7.975  |
| <b>SSLC-2</b>                      | 2.40                      | 831.74              | 0.031          | 10.576 |
| <b>SSLC-3</b>                      | 1.61                      | 528.54              | 0.020          | 6.721  |

**Table S10** Comparison of photocatalytic CO<sub>2</sub> reduction: CO yield of different photocatalysts.

| Sample                                                                               | Light source  | Activity<br>( $\mu\text{mol}\cdot\text{g}^{-1}\cdot\text{h}^{-1}$ ) | Selection<br>(%) | Reference |
|--------------------------------------------------------------------------------------|---------------|---------------------------------------------------------------------|------------------|-----------|
| ZnZn-Salen-COF                                                                       | 300 W Xe lamp | 102.10                                                              |                  | 3         |
| Cs <sub>4</sub> Mn(Bi <sub>1-x</sub> Sb <sub>x</sub> ) <sub>2</sub> Cl <sub>12</sub> | 300 W Xe lamp | 35.10                                                               | 100.00           | 4         |
| 30%-Sb/g-C <sub>3</sub> N <sub>4</sub>                                               | 300 W Xe lamp | 2.03                                                                |                  | 5         |
| Cs <sub>3</sub> Sb <sub>2</sub> I <sub>9</sub>                                       | 300 W Xe lamp | 95.70                                                               | 96.96            | 6         |
| CoBi@N-GC-10%-7                                                                      | 300 W Xe lamp | 44.09                                                               | 55.00            | 7         |
| SSLC-2                                                                               | 300 W Xe lamp | 831.74                                                              | 99.71            | This work |
| Coembedding                                                                          |               |                                                                     |                  |           |
| plasmonic Au                                                                         | visible-light | 84.70                                                               | 25.45            | 8         |
| nanocrystals                                                                         |               |                                                                     |                  |           |
| DPC-C4-Ni                                                                            | solar light   | 2464                                                                | 95.00            | 9         |

The reduction units of the last two substances are:  $\text{mmol}\cdot\text{g}^{-1}\cdot\text{h}^{-1}$

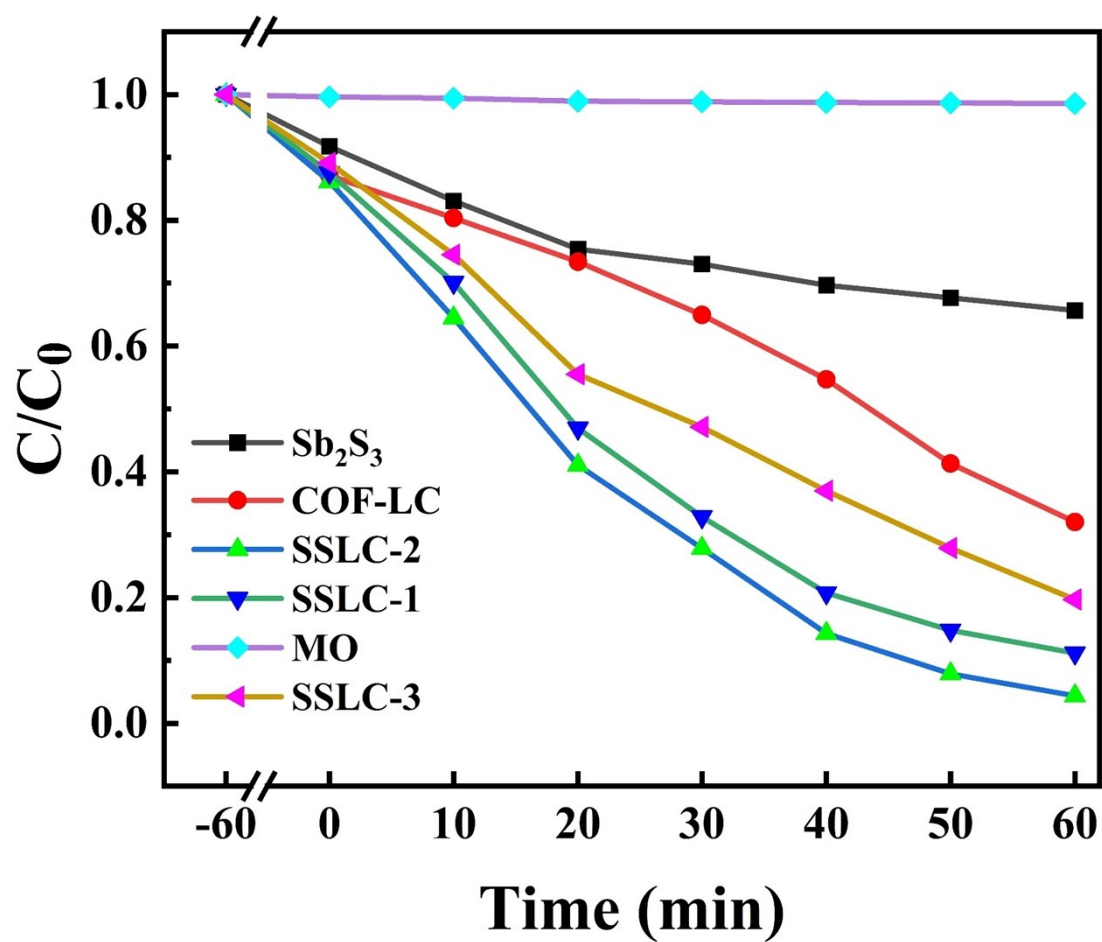

**Fig. S12** Photocatalytic degradation rate of SSLC-2 on  $20 \text{ mg}\cdot\text{L}^{-1}$  MO under visible light irradiation.



**Table S11** Comparison of SSLC-2 heterojunction with other catalysts for photocatalytic degradation of MB under UV-visible irradiations.

| Sample/mg                                                                           | V (mL) / C <sub>0</sub><br>(mg·L <sup>-1</sup> ) | Time<br>(min) | Light<br>source  | Result<br>(%) | TOF    | Ref           |
|-------------------------------------------------------------------------------------|--------------------------------------------------|---------------|------------------|---------------|--------|---------------|
| BSTO/25                                                                             | 50/10                                            | 180           | sunlight         | 77.30         | 0.0858 | <sup>10</sup> |
| Sb <sub>2</sub> S <sub>3</sub> /SiO <sub>2</sub> /25                                | 50/6                                             | 120           | Visible<br>light | 92.50         | 0.0925 | <sup>11</sup> |
| Bi <sub>2</sub> S <sub>3</sub> /Sb <sub>2</sub> S <sub>3</sub> /30                  | 50/10                                            | 30            | Visible<br>light | 94.33         | 0.5241 | <sup>12</sup> |
| CoNi <sub>2</sub> S <sub>4</sub> /MoS <sub>2</sub> /20                              | 100/10                                           | 90            | Visible<br>light | 100.00        | 0.5555 | <sup>13</sup> |
| 25 wt. % Sb <sub>2</sub> S <sub>3</sub> /α-<br>Ag <sub>2</sub> WO <sub>4</sub> / 50 | 100/20                                           | 60            | Visible<br>light | 91.23         | 0.6082 | <sup>14</sup> |
| SSLC-2/10                                                                           | 50/30                                            | 60            | Visible<br>light | 93.15         | 2.3288 | This<br>work  |

TOF is calculated according to an equation:

$$TOF = (C_0 \times V_{TC} \times \text{Degradation rate}) / (m_{\text{catalyst}} \times t) \quad (9)$$

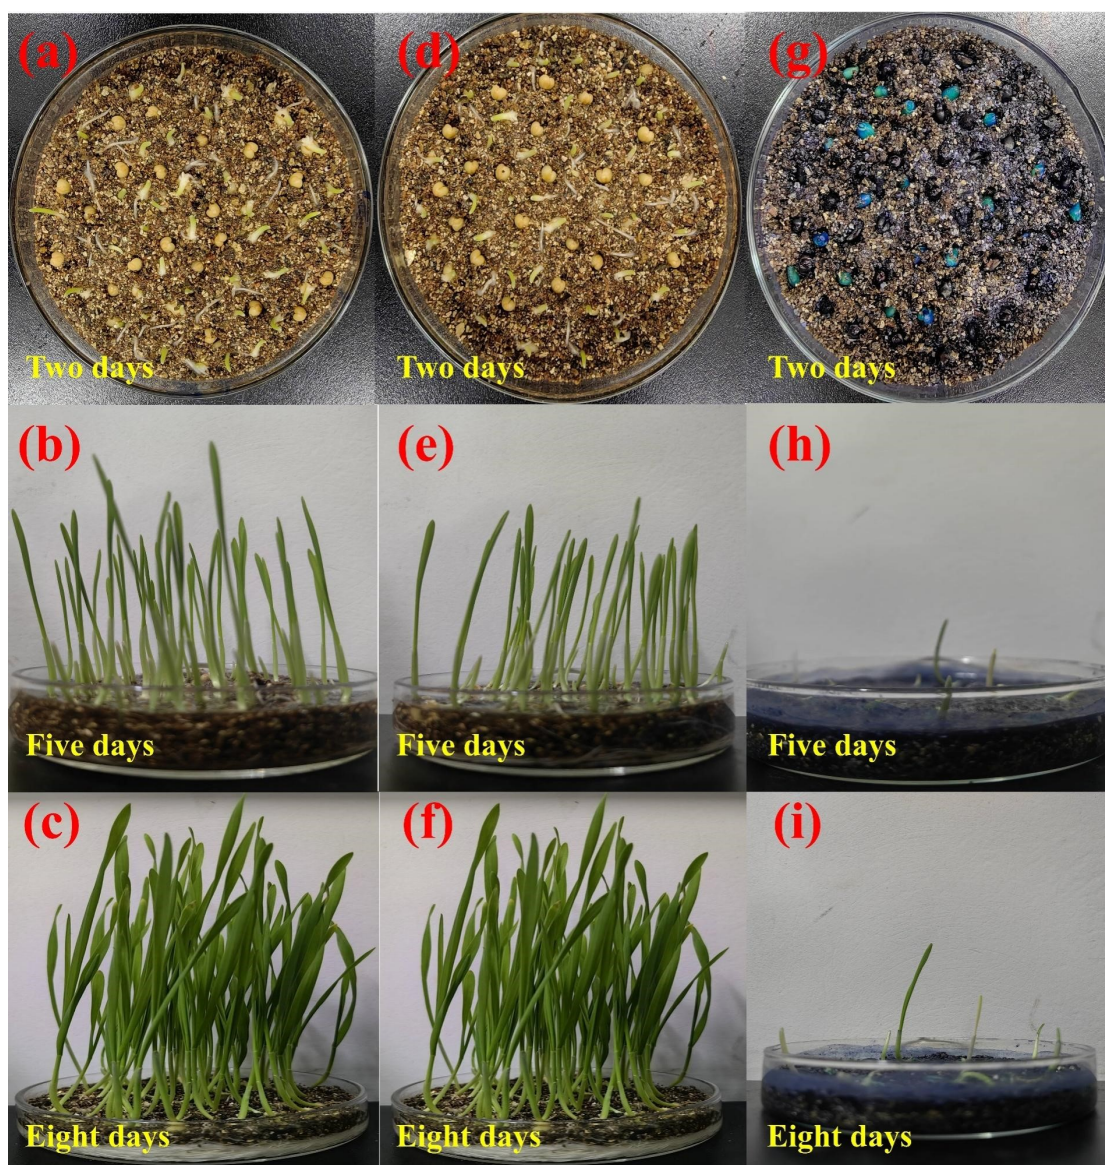

**Fig. S13** Growth of wheat seeds in (a, b, c) tap water; (d, e, f) MB-containing solutions and (g, h, i) photocatalytic treatment solutions.

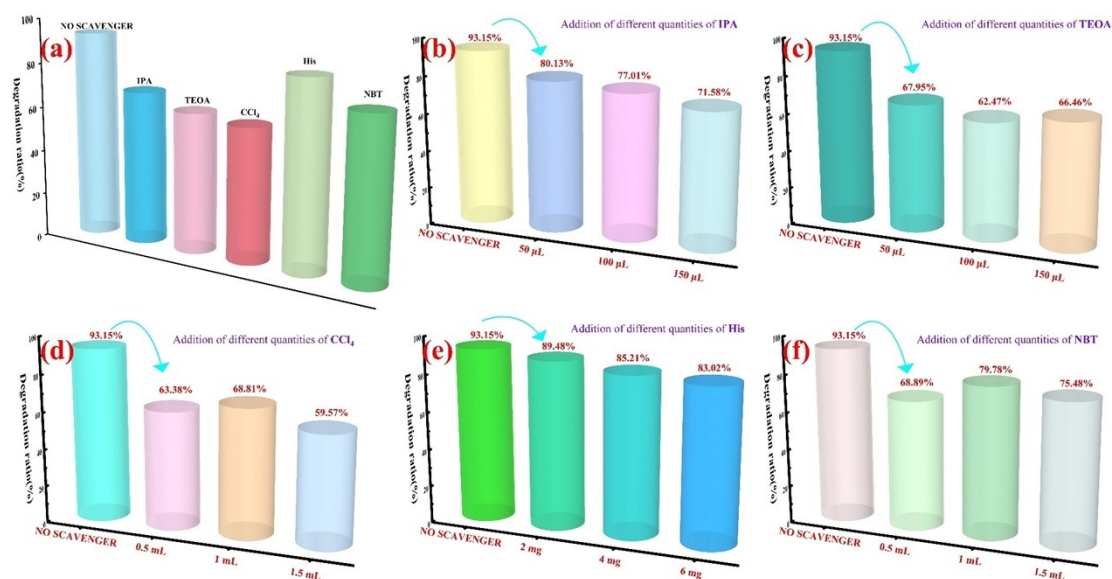

**Fig. S14** (a)The radical trapping test of SSLC-2 by different scavengers; (b) IPA; (c) TEOA; (d) CCl<sub>4</sub>; (e) His; (f) NBT.

**Table S12** Partly displayed XPS binding energy data corrected by C 1s level at 284.8 eV plus correspond to FWHM value.

| SAMPLE                         | ELEMENT | DATA   | CORRECTION DATA | FWHM (EV) |
|--------------------------------|---------|--------|-----------------|-----------|
| Sb <sub>2</sub> S <sub>3</sub> | Sb 3d   | 528.89 | 528.85          | 0.98      |
| COF-LC                         | O 1s    | 531.51 | 531.39          | 1.72      |
| SSLC-2                         | Sb 3d   | 529.68 | 529.84          | 1.45      |
|                                | O 1s    | 529.68 | 529.84          | 1.45      |

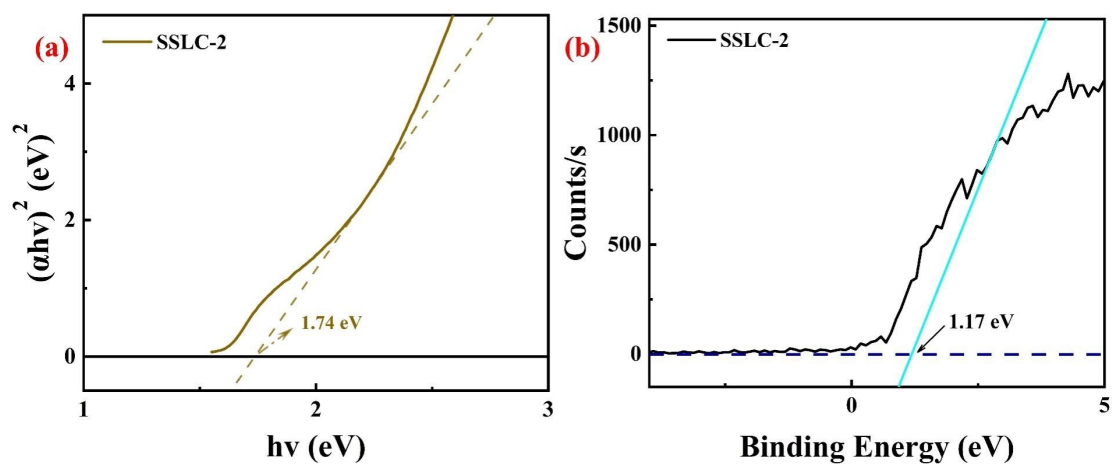

**Fig. S15** (a) Band gap value and (c) valence band value of SSLC-2.

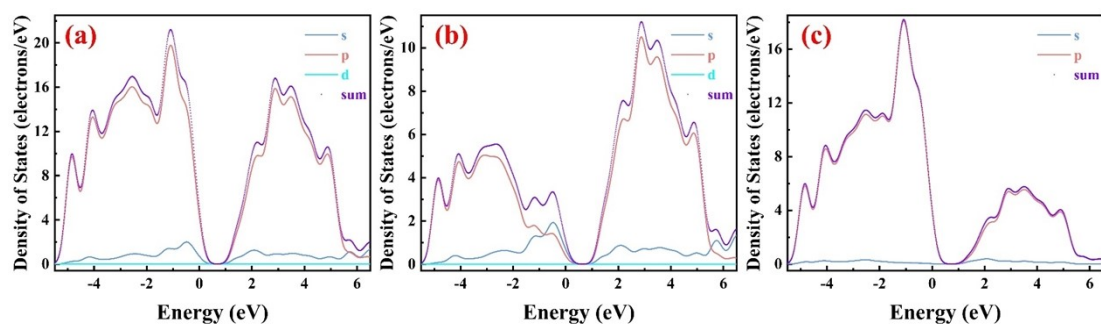

**Fig. S16** PDOS plots of  $\text{Sb}_2\text{S}_3$  (a) general; (b) Sb; (c) S.

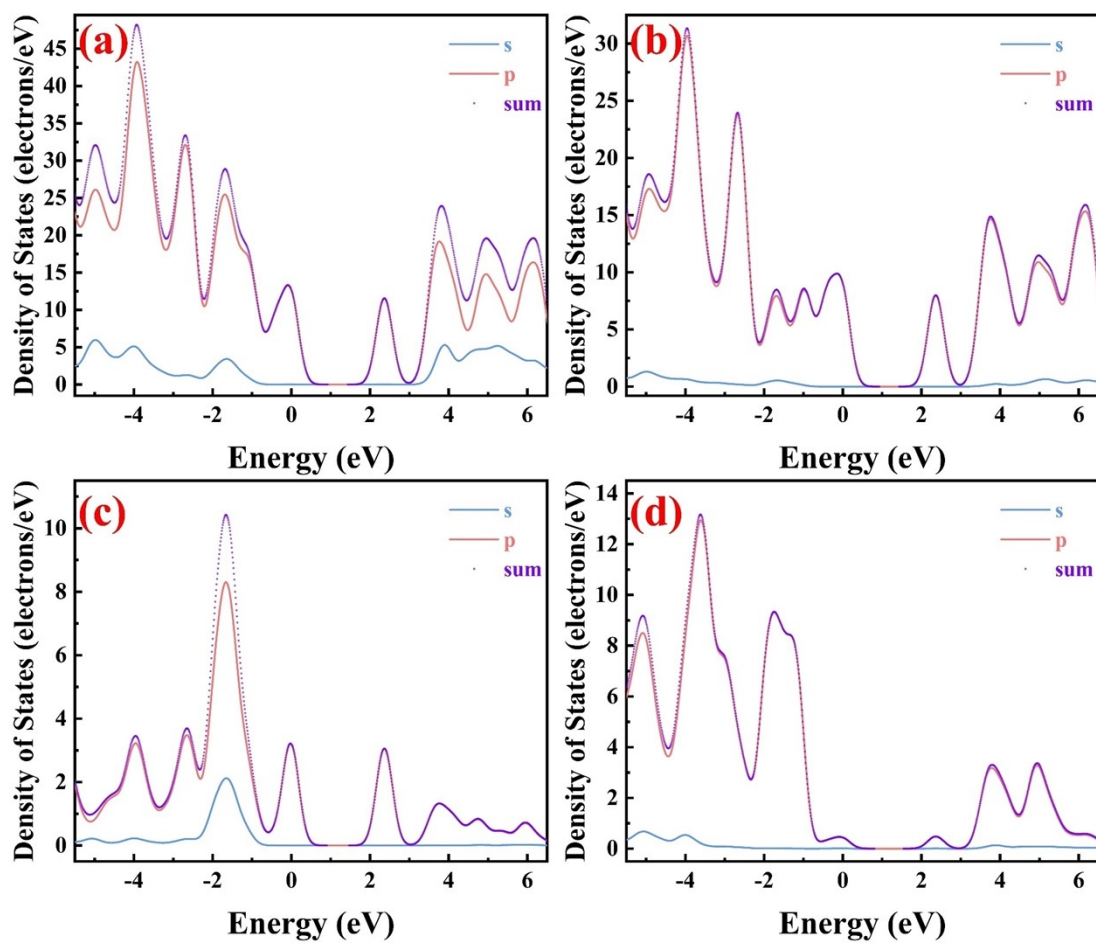

**Fig. S17** PDOS plots of COF-LC (a) general; (b) C; (c) N; (d) F.



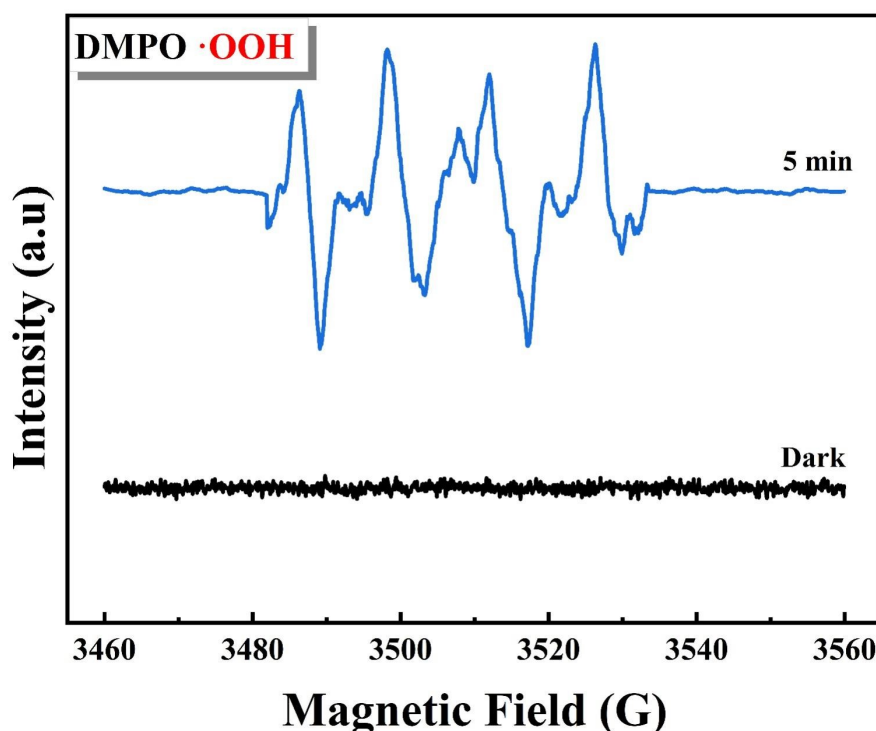

**Fig. S18** ESR spectra of SSLC-2 heterojunction in dark and light.

## References

1. L. Cheng, X. Yue, L. Wang, D. Zhang, P. Zhang, J. Fan and Q. Xiang, *Advanced Materials*, 2021, **33**, 2105135.
2. H. Lin, K. Zhang, G. Yang, Y. Li, X. Liu, K. Chang, Y. Xuan and J. Ye, *Applied Catalysis B: Environmental*, 2020, **279**, 119387.
3. H. Dong, L. Fang, K. X. Chen, J. X. Wei, J. X. Li, X. Qiao, Y. Wang, F. M. Zhang and Y. Q. Lan, *Angewandte Chemie International Edition*, 2024, DOI: 10.1002/anie.202414287.
4. H. Wei, Z. Li, H. Wang, Y. Yang, P. Cheng, P. Han, R. Zhang, F. Liu, P. Zhou and K. Han, *Journal of Energy Chemistry*, 2023, **82**, 18-24.
5. J. Zhang, J. Fu and K. Dai, *Journal of Materials Science & Technology*, 2022, **116**, 192-198.
6. Y. Wang, Q. Zhou, Y. Zhu and D. Xu, *Applied Catalysis B: Environmental*, 2021, **294**.
7. F. Lv, L. He, X. Bai, D. Wang and Y. Zhao, *Journal of Colloid and Interface Science*, 2024, **675**, 1069-1079.
8. J. Dong, Z. Yang, H. Li, Y. Li and J. Wei, *Journal of the American Chemical Society*, 2025, DOI: 10.1021/jacs.5c13007.
9. R. Verma, R. Belgamwar, P. Chatterjee, R. Bericat-Vadell, J. Sa and V. Polshettiwar, *ACS Nano*, 2023, **17**, 4526-4538.
10. M. S. Patil, N. Kitchamsetti, S. R. Mulani, S. R. Rondiya, N. G. Deshpande, R. A. Patil, R. W. Cross, N. Y. Dzade, K. K. Sharma, P. S. Patil, Y.-R. Ma, H. K. Cho and R. S. Devan, *Journal of the Taiwan Institute of Chemical Engineers*, 2021, **122**, 201-209.

11. S. Sharma and S. Basu, *Journal of Cleaner Production*, 2021, **280**.
12. X. Li, K. Yang, F. Wang, K. Shi, W. Huang, K. Lu, C. Yu, X. Liu and M. Zhou, *Journal of Alloys and Compounds*, 2023, **953**.
13. B. R. Anusha, Udayabhanu, S. Appu, F. Alharethy, G. Srinivas Reddy, Abhijna, M. A. Sangamesha, G. Nagaraju, S. Girish Kumar and K. Prashantha, *Journal of Physics and Chemistry of Solids*, 2025, **198**.
14. C. Ayappan, V. Jayaraman, B. Palanivel, A. Pandikumar and A. Mani, *Separation and Purification Technology*, 2020, **236**.
